# Supplementary material for: Electronic structure modulation of Pdn (n = 2–5) nanoclusters in the hydrogenation of cinnamaldehyde
Source: Royal Society of Chemistry journal article supplement (doi:10.1039/d3cc01794j), 2023-01-01
Supplement: d3cc01794j1.pdf [file d3cc01794j1.pdf]

## **Electronic Structure Modulation of Pd<sub>n</sub>(n=2~5) Nanoclusters in the Hydrogenation of Cinnamaldehyde**

Jie Tang<sup>a, c</sup>, Tingting Ge<sup>a, c</sup>, Wenxuan Wang<sup>a, b</sup>, Chao Liu<sup>a, \*</sup> and Jiahui Huang<sup>a, \*</sup>

<sup>a</sup>. Dalian National Laboratory for Clean Energy, Dalian Institute of Chemical Physics, Chinese Academy of Sciences, Dalian 116023, China

<sup>b</sup>. College of Materials Science and Engineering, Northeast Forestry University, Harbin 150040, China

<sup>c</sup>. University of Chinese Academy of Sciences, Beijing 100049, China

## **Experimental section**

### **Chemicals**

(NH<sub>4</sub>)<sub>2</sub>PdCl<sub>4</sub>, sodium borohydride (NaBH<sub>4</sub>, 98%, Sinopharm), tetra-n-octylammonium bromide (TOAB, 98%, TCI), ethanol (C<sub>2</sub>H<sub>5</sub>OH, analytical grade, Sinopharm), methanol (CH<sub>3</sub>OH, analytical grade, Sinopharm), toluene (C<sub>7</sub>H<sub>8</sub>, analytical grade, Sinopharm), dichloromethane (CH<sub>2</sub>Cl<sub>2</sub>, analytical grade, Sinopharm), Cinnamaldehyde (C<sub>9</sub>H<sub>8</sub>O, analytical grade, Aladdin), 3-Phenylpropionaldehyde (C<sub>9</sub>H<sub>10</sub>O, analytical grade, Aladdin), Cinnamic alcohol (C<sub>9</sub>H<sub>10</sub>O, analytical grade, Aladdin), 3-phenylpropanol (C<sub>9</sub>H<sub>12</sub>O, analytical grade, Aladdin), Di-1-adamantylphosphine (C<sub>20</sub>H<sub>31</sub>P, analytical grade, Aladdin). All the reagents purchased from commercial sources were used as received without further purification. The water used in all experiments was ultrapure.

### **Synthesis of Pd<sub>5</sub> nanoclusters**

A standard preparation method of Pd<sub>5</sub> nanoclusters was provided in detail, which was divided into synthesis and separation processes. In synthesis, (NH<sub>4</sub>)<sub>2</sub>PdCl<sub>4</sub> (28.4 mg, 0.100 mmol) was dissolved in a mixture of 10 mL dichloromethane (CH<sub>2</sub>Cl<sub>2</sub>) and 5 mL H<sub>2</sub>O, which was conducted in a 50 mL round-bottom flask. After 5 minutes, TOAB (TOAB: Tetra-n-octylammonium bromide) (103.8 mg, 0.190 mmol) was added stirring for 30 minutes and the CH<sub>2</sub>Cl<sub>2</sub> phase turns red. Then, the H<sub>2</sub>O was removed. Di-1-adamantylphosphine (45.4 mg, 0.15 mmol) was added and the solution turns golden, indicating the successful combination of Pd and ligands. After 60 minutes, the NaBH<sub>4</sub> (30.0 mg, 0.79 mmol) was dissolved into 3 mL ice water and the mixture was poured into the flask. Immediately, the solution turns black, indicating the formation of Pd clusters. The reaction proceeded at room temperature for 12 h. In separation process, the mixture was dried by vacuum rotary evaporator and washed with a large amount of methanol and acetone. The Pd<sub>5</sub> nanoclusters was obtained by extracting with CH<sub>2</sub>Cl<sub>2</sub>.

### **Synthesis of Pd<sub>4</sub> nanoclusters**

The Pd<sub>4</sub> nanoclusters was obtained by different separation from Pd<sub>5</sub> nanoclusters. After the same reaction proceed as Pd<sub>5</sub> nanoclusters, the mixture was washed by amount of MeOH and CH<sub>2</sub>Cl<sub>2</sub> was used to extracted the Pd<sub>4</sub> nanoclusters. Then, the mixture was dried by vacuum rotary evaporator and acetone was added to extracted Pd<sub>4</sub> nanoclusters.

### **Synthesis of Pd<sub>3</sub> nanoclusters**

The Pd<sub>3</sub> nanoclusters was obtained following the same synthesis method of Pd<sub>5</sub> nanoclusters, but with addition of excess NaBH<sub>4</sub> (60.0 mg, 1.58 mmol). In the separation part, the mixture was washed by massive MeOH and the Pd<sub>3</sub> was extracted from the mixture with acetone.

### **Synthesis of Pd<sub>2</sub> nanoclusters**

The Pd<sub>2</sub> nanoclusters was obtained in the present of excess ligands (90.8 mg, 0.30 mmol). In the separation part, the mixture was washed by massive MeOH and the Pd<sub>2</sub> was extracted from the mixture by using acetone.

### **The synthesis of Pd<sub>5</sub>/C, Pd<sub>4</sub>/C, Pd<sub>3</sub>/C and Pd<sub>2</sub>/C nanocluster catalysts**

500 mg activated charcoal was dispersed in a mixture of 20 mL CH<sub>2</sub>Cl<sub>2</sub> and 20 mL EtOH with a string of 500 rpm. Equivalent nanoclusters were added as 0.5 wt% Pd/C string for 6 h. The nanocluster catalysts were dried in vacuum overnight.

### **Catalysis test**

The catalyst test was conducted in the autoclave. Approximately 50.0 mg catalyst and 20 μL substrates were placed into a 25 mL autoclave with 10 mL toluene. The system was purged with H<sub>2</sub> flow to remove air, and then pressurized by 1.0 MPa H<sub>2</sub>. After reaction, the product mixture was analyzed by gas chromatography. The product was further confirmed by gas chromatography-mass spectrometry. Conversion and selectivity are determined by external standard method and the calculations are shown as follows:

$$\text{Conversion of CAL(\%)} = \frac{\text{moles of converted CAL}}{\text{initial moles of CAL}} * 100\%$$

$$\text{Selectivity of HCAL(\%)} = \frac{\text{moles of HCAL}}{\text{moles of converted CAL}} * 100\%$$

### **Characterization**

#### **UV-vis absorption spectroscopy (Uv-vis)**

UV-vis spectrum was performed on a Metash UV-8000s spectrophotometer (dissolved in dichloromethane) at room temperature.

#### **Electrospray ionization mass spectrum (ESI-MS)**

The ESI-MS of the Pd<sub>n</sub> nanocluster was tested by Fourier Transform Ion Cyclotron Resonance Mass Spectrometer (SolariX XR-15T), and the nanocluster was dissolved

in dichloromethane. A drop of solvents was added in a mixture of toluene and methanol (v: v= 1:1).

### **High Angle Annular Dark Field - Scanning Transmission Electron Microscopy (HAADF-STEM)**

The HAADF-STEM was performed on a Titan Themis ETEM G3 transmission electron microscope under low temperature by the liquid nitrogen. The samples were prepared by dropping an ethanol dispersion of samples onto carbon-coated copper grids and immediately evaporating the solvent.

### **X-ray photoelectron spectroscopy (XPS)**

XPS data were recorded on a Thermofisher Escalab 250 Xi<sup>+</sup> spectrometer using a standard Al K $\alpha$  mono-chromated flood source (150 W, pass energy = 200 eV, spot size = 500  $\mu$ m). All binding energies were referenced to C1s peak at 284.8 eV.

### **Inductively Coupled Plasma Optical Emission Spectrometer (ICP-OES)**

The concentration of palladium was determined by Inductively Coupled Plasma Optical Emission Spectrometer (ICP-OES) on a PerkinElmer ICP-OES 7300DV.

### **Attenuated Total Reflection IR (ATR-IR)**

The ATR data were collected at Bruker's Platinum ATR.

### **Thermogravimetric Analysis (TGA)**

Thermogravimetric analysis (TGA) was conducted on a TG-Q50 (TA) thermal analyzer heated from room temperature to 120 °C at a rate of 10 °C min<sup>-1</sup> in N<sub>2</sub> and kept for 10 minutes to remove water. Then it was heated from 120 °C to 700 °C at a rate of 10 °C min<sup>-1</sup> in N<sub>2</sub>.

### **Gas chromatograph- mass spectrometer (GC-MS)**

The hydrogenation products are analyzed by the Agilent GC-MS and GC (7890B) equipped with DB-35MS capillary column.

### **Density functional theory (DFT) calculations**

The generalized gradient approximation (GGA) in the Perdew-Burke-Ernzerhof (PBE) form and a cutoff energy of 600 eV for planewave basis set were adopted. A 2  $\times$  2  $\times$  2

Monkhorst-Pack grid was used for sampling the Brillouin zones at structure optimization. The ion-electron interactions were described by the projector augmented wave (PAW) method. The convergence criteria of structure optimization were chosen as the maximum force on each atom less than 0.01 eV/Å with an energy change less than  $1 \times 10^{-5}$  eV.

**Table S1.** The ICP-OES analysis of catalysts.

| Entry | Catalysts          | Pd (wt%) |
|-------|--------------------|----------|
| 1     | Pd <sub>2</sub> /C | 0.51     |
| 2     | Pd <sub>3</sub> /C | 0.53     |
| 3     | Pd <sub>4</sub> /C | 0.51     |
| 4     | Pd <sub>5</sub> /C | 0.57     |

**Table S2.** The XPS element analysis of catalysts.

| Catalysts          | Fraction of Components |                  |
|--------------------|------------------------|------------------|
|                    | Pd <sup>2+</sup>       | Pd <sup>δ+</sup> |
| Pd <sub>2</sub> /C | 83.3%                  | 16.7%            |
| Pd <sub>3</sub> /C | 46.3%                  | 53.7%            |
| Pd <sub>4</sub> /C | 59.2%                  | 40.8%            |
| Pd <sub>5</sub> /C | 33.8%                  | 66.2%            |

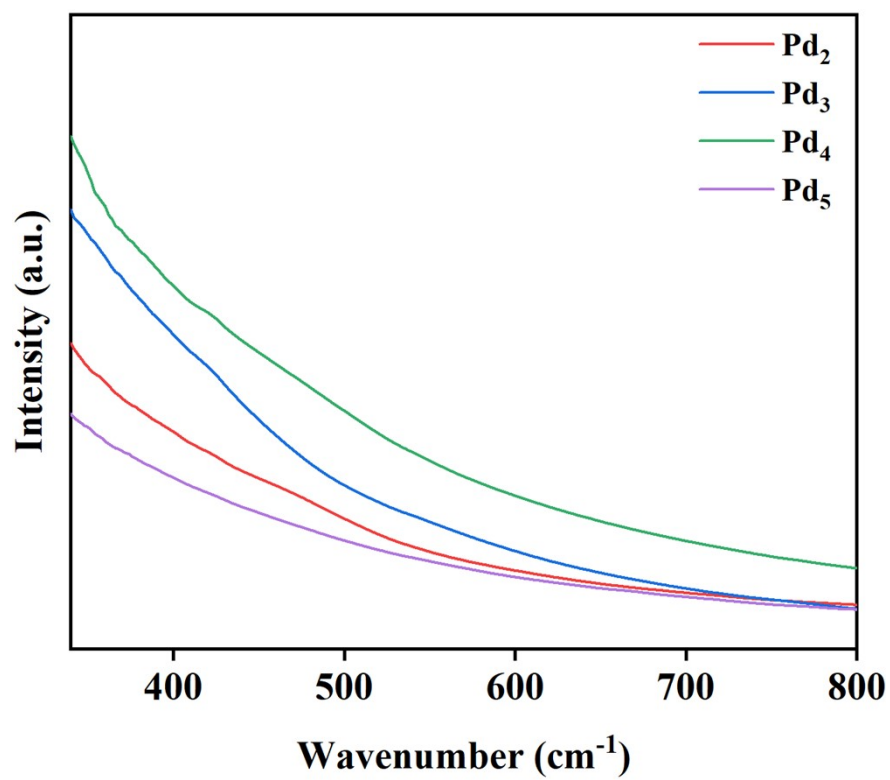

**Figure S1.** Uv-vis spectra of different Pd<sub>n</sub> nanoclusters.



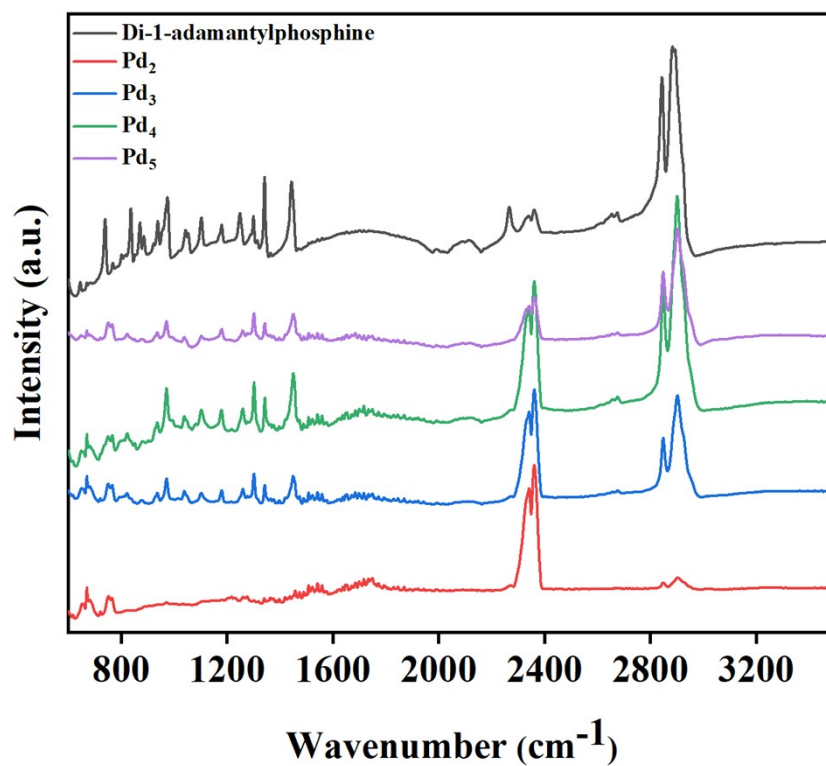

**Figure S2.** ATR-IR spectra of different Pd<sub>n</sub> nanoclusters and Di-1-adamantylphosphine.

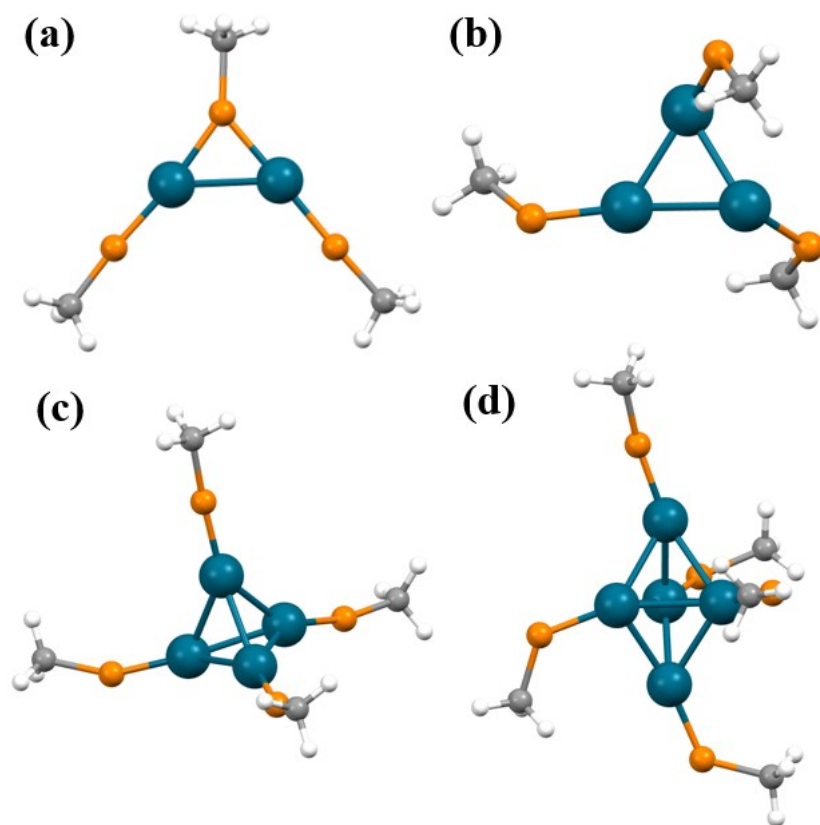

**Figure S3.** The optimized structures of (a) Pd<sub>2</sub>, (b) Pd<sub>3</sub>, (c) Pd<sub>4</sub> and (d) Pd<sub>5</sub> nanoclusters based on DFT calculations.

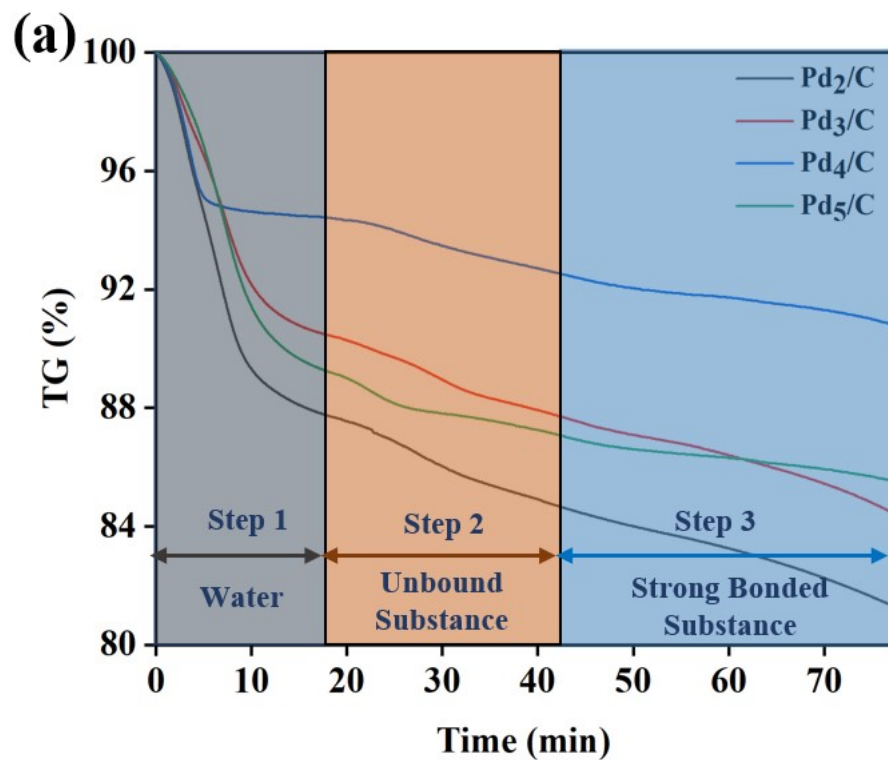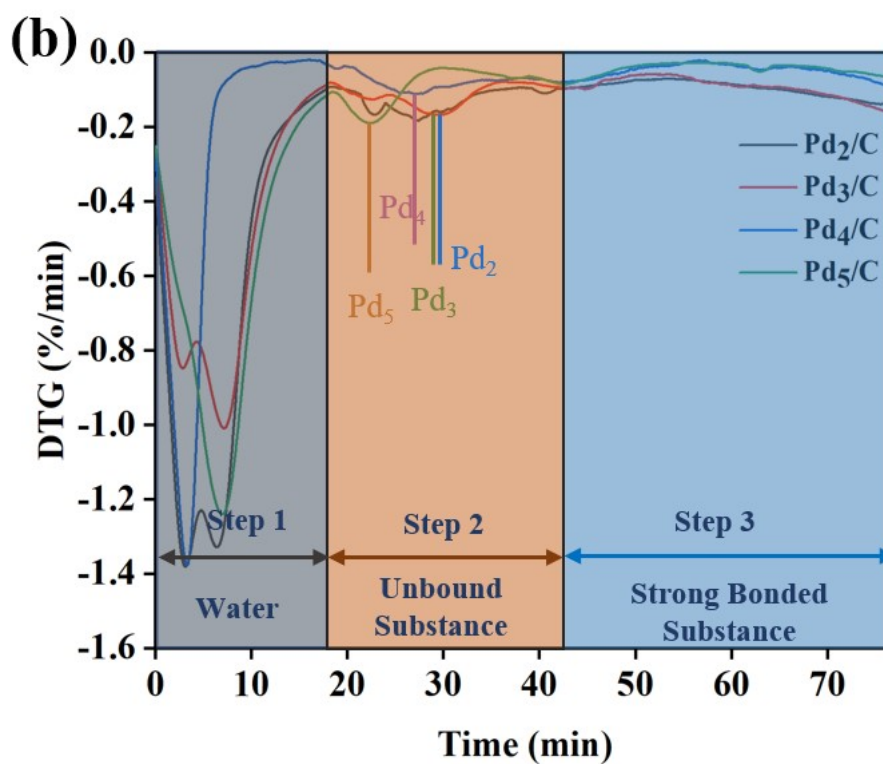

**Figure S4.** Thermogravimetric analysis of catalysts. (a) TG curve. (b) DTG curve.

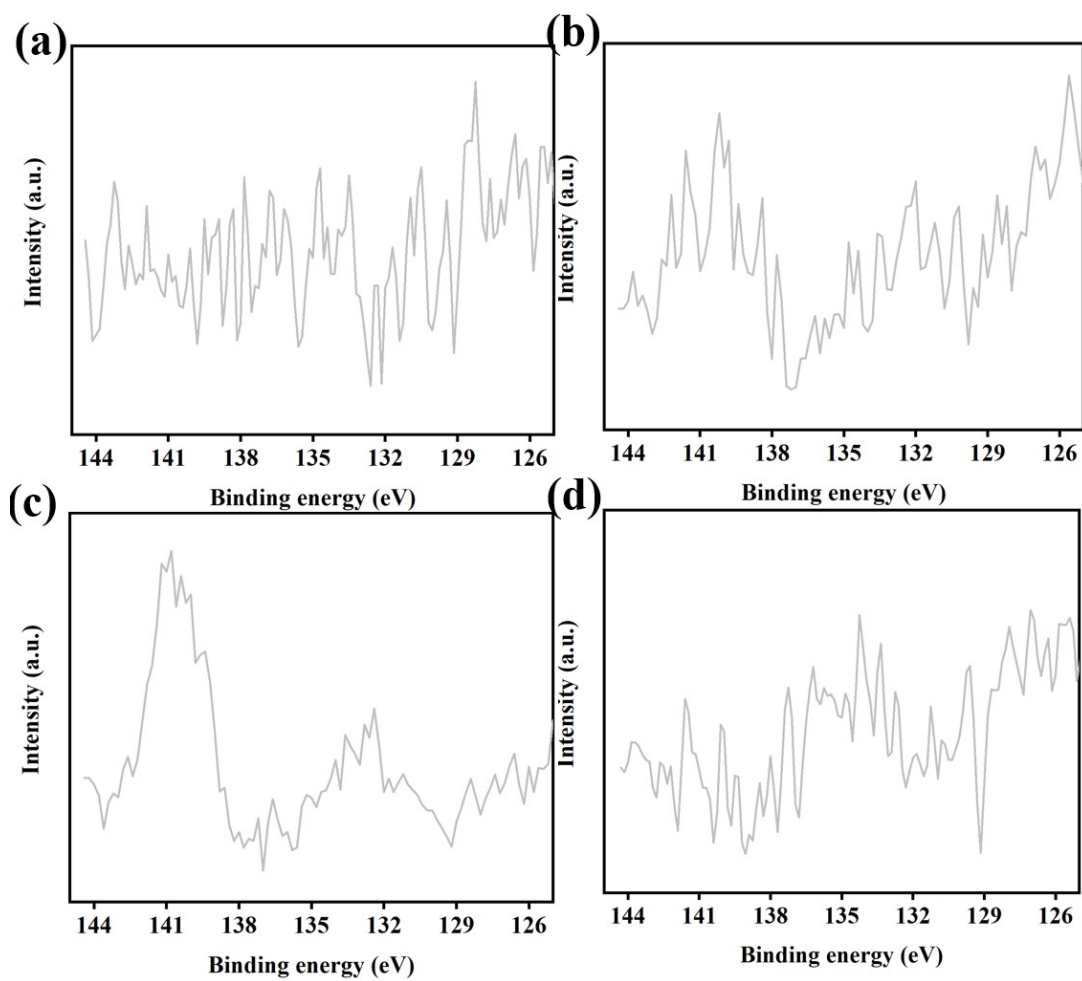

**Figure S5.** High resolution XPS analysis of Pd 2p. (a) Pd<sub>2</sub>/C; (b) Pd<sub>3</sub>/C; (c) Pd<sub>4</sub>/C; (d) Pd<sub>5</sub>/C.

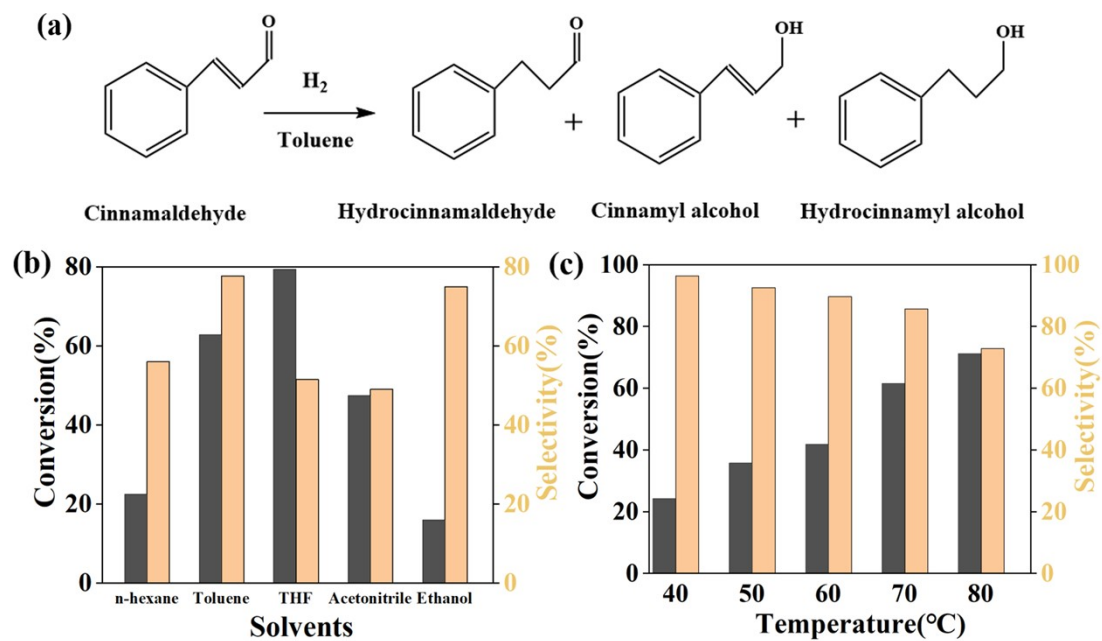

**Figure S6.** (a) Reaction products of the hydrogenation of cinnamaldehyde. (b) Catalytic tests of Pd<sub>5</sub>/C in different solvents. Conditions: 20 mg catalysts, 100 μL substrates, 60 °C, 60 min, 1 MPa H<sub>2</sub>, 1000 rpm. (c) Catalytic tests of Pd<sub>5</sub>/C under different temperature. Conditions: 20 mg catalysts, 100 μL substrates, 10 mL toluene, 4 h, 1 MPa H<sub>2</sub>, 1000 rpm.

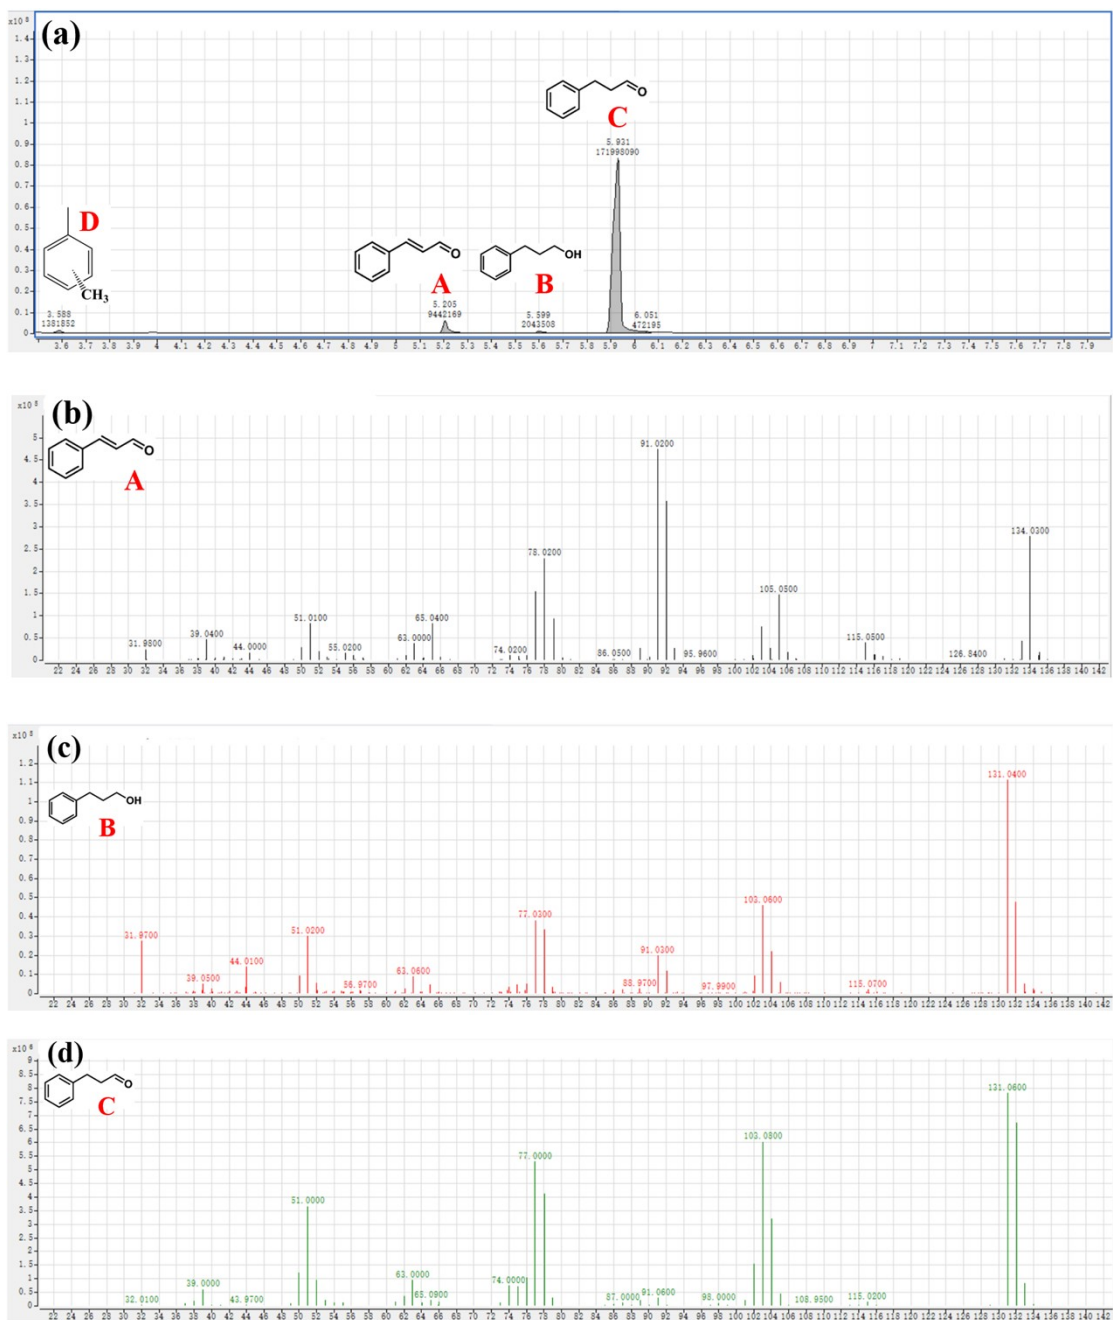

**Figure S7.** (a) Gas chromatography of the solution after catalytic reaction and the mass spectra of corresponding products (b) cinnamaldehyde, (c) hydrocinnamyl alcohol and (d) hydrocinnamaldehyde. The D (xylene) was from methylbenzene.
